# Supplementary material for: Genome-Wide Identification and Analysis of the Metallothionein Genes in Oryza Genus
Source: MDPI journal article supplement (doi:10.3390/ijms22179651), 2021-09-06
Supplement: s1 [file s1]

**Supplementary Table S3.** the MT genes in each orthogroup

| <b>Name</b> | <b>Os</b>      | <b>Or</b>      | <b>On</b> | <b>Oi</b>               | <b>Og</b>      | <b>Ob</b>      |
|-------------|----------------|----------------|-----------|-------------------------|----------------|----------------|
| Orthogroup0 | OsMT-6         | OrMT-7, OrMT-9 | OnMT-6    | OiMT-6, OiMT-7, OiMT-12 | OgMT-5, OgMT-7 | ObMT-7         |
| Orthogroup1 | OsMT-2         | OrMT-2         | OnMT-4    | OiMT-3                  | OgMT-2         | ObMT-1         |
| Orthogroup2 | OsMT-4         | OrMT-3         |           | OiMT-5, OiMT-10         | OgMT-4         | ObMT-3         |
| Orthogroup3 | OsMT-8         | OrMT-5         | OnMT-3    | OiMT-11                 |                | ObMT-5, ObMT-9 |
| Orthogroup4 | OsMT-7         | OrMT-8         | OnMT-2    | OiMT-9                  | OgMT-6         | ObMT-8         |
| Orthogroup5 | OsMT-1         | OrMT-1         | OnMT-1    | OiMT-1, OiMT-2          | OgMT-1         |                |
| Orthogroup6 | OsMT-5, OsMT-9 | OrMT-4         |           | OiMT-8                  |                | ObMT-4         |
| Orthogroup7 |                |                | OnMT-7    |                         | OgMT-3         | ObMT-2         |
| Orthogroup8 |                | OrMT-6         | OnMT-5    |                         |                | ObMT-6         |
