# Supplementary material for: Genome-Wide Identification and Analysis of the Metallothionein Genes in Oryza Genus
Source: MDPI journal article supplement (doi:10.3390/ijms22179651), 2021-09-06
Supplement: s1 [file s1]

**Supplementary Table S6.** List of oligonucleotide primers used for qRT-PCR analysis

| <b>Name</b> | <b>Forward (+)</b>      | <b>Reverse (-)</b>     |
|-------------|-------------------------|------------------------|
| OsMT-1QPCR  | ATGTCGTGCTGCGGAGGAAA    | TCACTTGCCGCAGTTGCAGG   |
| OsMT-2QPCR  | CTGTGGATCAAGCTGTGGCT    | CTCGAAGTGCGCCTTCTCC    |
| OsMT-3QPCR  | CCACCAAGACCTTCGTCCTC    | TAAATCCTCATGCAGCCGGG   |
| OsMT-4QPCR  | CAAACCTGCTCCTGCGGAAAG   | TCAAACCTGCTGCGCCTTCTT  |
| OsMT-5QPCR  | CCATCACCCTACTACTACAACCA | ATGGGCACCCTCACCAGATT   |
| OsMT-6QPCR  | AGATGTACCCTGACCTGGCT    | GATTCAGCTGCCTTGCCAAC   |
| OsMT-7QPCR  | CAAGAAGATGTCTTGCTGCGGA  | CCCCGAGGACCATAGTTGCT   |
| OsMT-8QPCR  | TAAGCTGCGGCTGCGGAAAG    | AGCAGCCTCGAACACCGCTT   |
| OsMT-9QPCR  | GTCCTAGGCACTCTGAGGGG    | CCTTAGCAGTTGCAGGGGTT   |
| Actin       | TGCTATGTACGTCGCCATCCAG  | AATGAGTAACCACGCTCCGTCA |
