# Supplementary material for: Genome-Wide Identification and Analysis of the Metallothionein Genes in Oryza Genus
Source: MDPI journal article supplement (doi:10.3390/ijms22179651), 2021-09-06
Supplement: s1 [file s1]

**Supplementary Table S7.** List of oligonucleotide primers used for subcellular localization analysis

| Name       | Forward (+)                                         | Reverse (-)                                        |
|------------|-----------------------------------------------------|----------------------------------------------------|
| HBT-OsMT-1 | CCTCTCCCCTTGCTCCGTGGATCCATGTCGTGCTGCGGAGGAACT       | CTCGCCCTTGCTCACCATGGATCCCTTGCCGCAGTTGCAGGGGTTGC    |
| HBT-OsMT-3 | CCTCTCCCCTTGCTCCGTGGATCCATGGATGCAGATGCAAGATG        | CTCGCCCTTGCTCACCATGGATCCAAGCTCTGATCGACAGTAGC       |
| HBT-OsMT-4 | CCTCTCCCCTTGCTCCGTGGATCCATGTCTTGCAGCTGTGGATCTA      | CTCGCCCTTGCTCACCATGGATCCGCAGTTGCAAGGGTTGCACCTG     |
| HBT-OsMT-5 | CCTCTCCCCTTGCTCCGTGGATCCATGTCGTGCGGTGGAAGTT-GCAACT  | CTCGCCCTTGCTCACCATGGATCCGCAGTTGCAGGGGTTGCACTT-GCAG |
| HBT-OsMT-6 | CCTCTCCCCTTGCTCCGTGGATCCATGTCGTGCGGTGGAAGTTGCAA     | CTCGCCCTTGCTCACCATGGATCCGCAGTTGCAGGGGTTGCACTTGC    |
| HBT-OsMT-7 | CCTCTCCCCTTGCTCCGTGGATCCATGCATTGCACTCATCTCAA-GCTTTT | CTCGCCCTTGCTCACCATGGATCCGCAGTTGCAGGGATTGCATTTGCA   |
