# Supplementary material for: Genome-Wide Identification and Analysis of the Metallothionein Genes in Oryza Genus
Source: MDPI journal article supplement (doi:10.3390/ijms22179651), 2021-09-06
Supplement: s1 [file s1]

**Supplementary Table S1.** MT genes were identified in six *Oryza* species/subspecies.

| Species                                     | Name    | Identifier       | CHR     | CHR.start | CHR.end  | Subfamily |
|---------------------------------------------|---------|------------------|---------|-----------|----------|-----------|
| <i>Oryza sativa</i><br><i>ssp. japonica</i> | OsMT-1  | LOC_Os01g05650.1 | Oschr1  | 2693134   | 2695085  | group 2   |
|                                             | OsMT-2  | LOC_Os03g17870.1 | Oschr3  | 9957429   | 9958013  | group 4   |
|                                             | OsMT-3  | LOC_Os05g02070.2 | Oschr5  | 605760    | 606871   | group 2   |
|                                             | OsMT-4  | LOC_Os11g47809.1 | Oschr11 | 28827676  | 28828513 | group 3   |
|                                             | OsMT-5  | LOC_Os12g38010.1 | Oschr12 | 23352191  | 23353189 | group 1   |
|                                             | OsMT-6  | LOC_Os12g38051.1 | Oschr12 | 23382984  | 23391427 | group 1   |
|                                             | OsMT-7  | LOC_Os12g38270.1 | Oschr12 | 23501361  | 23502386 | group 1   |
|                                             | OsMT-8  | LOC_Os12g38290.1 | Oschr12 | 23512497  | 23513477 | group 1   |
|                                             | OsMT-9  | LOC_Os12g38300.1 | Oschr12 | 23515147  | 23515798 | group 1   |
| <i>Oryza rufipogon</i>                      | OrMT-1  | ORUFI01G03290.1  | Orchr1  | 2375753   | 2377195  | group 2   |
|                                             | OrMT-2  | ORUFI03G13950.1  | Orchr3  | 9631567   | 9632983  | group 4   |
|                                             | OrMT-3  | ORUFI11G25490.1  | Orchr11 | 27566267  | 27574583 | group 3   |
|                                             | OrMT-4  | ORUFI12G17960.1  | Orchr12 | 19644624  | 19645305 | group 1   |
|                                             | OrMT-5  | ORUFI12G17980.1  | Orchr12 | 19654383  | 19655325 | group 1   |
|                                             | OrMT-6  | ORUFI12G18000.1  | Orchr12 | 19658884  | 19661583 | group 1   |
|                                             | OrMT-7  | ORUFI12G18020.1  | Orchr12 | 19665489  | 19666156 | group 1   |
|                                             | OrMT-8  | ORUFI12G18180.1  | Orchr12 | 19787432  | 19788503 | group 1   |
|                                             | OrMT-9  | ORUFI12G18190.1  | Orchr12 | 19795680  | 19798408 | group 1   |
| <i>Oryza nivara</i>                         | OnMT-1  | ONIVA01G03530.1  | Onchr1  | 2564823   | 2566241  | group 2   |
|                                             | OnMT-2  | ONIVA02G22070.1  | Onchr2  | 20297073  | 20298088 | group 1   |
|                                             | OnMT-3  | ONIVA02G22080.4  | Onchr2  | 20309128  | 20310197 | group 1   |
|                                             | OnMT-4  | ONIVA03G14560.1  | Onchr3  | 10521390  | 10523037 | group 4   |
|                                             | OnMT-5  | ONIVA08G18040.1  | Onchr8  | 19520465  | 19537852 | group 1   |
|                                             | OnMT-6  | ONIVA08G18060.1  | Onchr8  | 19542246  | 19542886 | group 1   |
|                                             | OnMT-7  | ONIVA10G19390.1  | Onchr10 | 19531399  | 19532084 | group 2   |
| <i>Oryza indica</i>                         | OiMT-1  | BGIOSGA002385-PA | Oichr1  | 3217847   | 3218618  | group 2   |
|                                             | OiMT-2  | BGIOSGA002389-PA | Oichr1  | 3160509   | 3161953  | group 2   |
|                                             | OiMT-3  | BGIOSGA012380-PA | Oichr3  | 10856082  | 10856666 | group 4   |
|                                             | OiMT-4  | BGIOSGA019039-PA | Oichr5  | 610754    | 611232   | group 2   |
|                                             | OiMT-5  | BGIOSGA035740-PA | Oichr11 | 22867298  | 22867663 | group 3   |
|                                             | OiMT-6  | BGIOSGA035979-PA | Oichr12 | 18905862  | 18906502 | group 1   |
|                                             | OiMT-7  | BGIOSGA035981-PA | Oichr12 | 18899292  | 18899924 | group 1   |
|                                             | OiMT-8  | BGIOSGA035984-PA | Oichr12 | 18867275  | 18867956 | group 1   |
|                                             | OiMT-9  | BGIOSGA037630-PA | Oichr12 | 19026871  | 19027444 | group 1   |
|                                             | OiMT-10 | BGIOSGA037631-PA | Oichr12 | 19029456  | 19029717 | group 1   |
|                                             | OiMT-11 | BGIOSGA037632-PA | Oichr12 | 19037320  | 19037954 | group 1   |
|                                             | OiMT-12 | BGIOSGA037633-PA | Oichr12 | 19039881  | 19040511 | group 1   |

Supplementary Table S1. Cont.

| Species                  | Name   |                 | CHR     | CHR.start | CHR.end  | Subfamily |
|--------------------------|--------|-----------------|---------|-----------|----------|-----------|
|                          | Gene   | Identifier      |         |           |          |           |
| <i>Oryza glumipatula</i> | OgMT-1 | OGLUM01G03480.1 | Ogchr1  | 2753761   | 2755470  | group 2   |
|                          | OgMT-2 | OGLUM03G13410.1 | Ogchr3  | 10121823  | 10123266 | group 4   |
|                          | OgMT-3 | OGLUM10G17340.1 | Ogchr10 | 20756174  | 20756859 | group 2   |
|                          | OgMT-4 | OGLUM11G22770.4 | Ogchr11 | 26716197  | 26717561 | group 3   |
|                          | OgMT-5 | OGLUM12G17670.6 | Ogchr12 | 22609998  | 22618164 | group 1   |
|                          | OgMT-6 | OGLUM12G17910.1 | Ogchr12 | 22834106  | 22836563 | group 1   |
|                          | OgMT-7 | OGLUM12G17920.1 | Ogchr12 | 22840323  | 22843866 | group 1   |
| <i>Oryza barthii</i>     | ObMT-1 | OBART03G13300.1 | Obchr3  | 9198490   | 9199770  | group 4   |
|                          | ObMT-2 | OBART10G17320.1 | Obchr10 | 17462327  | 17463010 | group 2   |
|                          | ObMT-3 | OBART11G23600.1 | Obchr11 | 22854740  | 22856090 | group 3   |
|                          | ObMT-4 | OBART12G16160.1 | Obchr12 | 16957905  | 16958586 | group 1   |
|                          | ObMT-5 | OBART12G16170.1 | Obchr12 | 16969402  | 16970344 | group 1   |
|                          | ObMT-6 | OBART12G16180.1 | Obchr12 | 16973950  | 16976647 | group 1   |
|                          | ObMT-7 | OBART12G16200.1 | Obchr12 | 16982500  | 16983167 | group 1   |
|                          | ObMT-8 | OBART12G16350.1 | Obchr12 | 17086220  | 17087191 | group 1   |
|                          | ObMT-9 | OBART12G16360.4 | Obchr12 | 17091194  | 17092245 | group 1   |

Note: CHR/chr in Supplementary Table S1 represents a chromosome. Os represents *Oryza sativa* ssp. *japonica*. Or represents *Oryza rufipogon*. On represents *Oryza nivara*. Oi represents *Oryza sativa* ssp. *indica*. Og represents *Oryza glumaepatula*. Ob represents *Oryza barthii*.
