# Supplementary material for: Genome-Wide Identification and Analysis of the Metallothionein Genes in Oryza Genus
Source: MDPI journal article supplement (doi:10.3390/ijms22179651), 2021-09-06
Supplement: s1 [file s1]

**Supplementary Table S2.** The conserved motifs of *OsMT* genes

| Motif ID | Sequence                                           | Width |
|----------|----------------------------------------------------|-------|
| 1        | KMYPDLAEKITTTTTTATTVL                              | 21    |
| 2        | EGVGKAAESGEAAHGCSCGSSCK                            | 23    |
| 3        | MSCGGSCNCGS                                        | 11    |
| 4        | CNPCNC                                             | 6     |
| 5        | VAPEKGHF                                           | 8     |
| 6        | IITLLSPFLRVKTLFRFSDGRCLRFNAIFLLGDFVLKTLPY          | 41    |
| 7        | LFIRSRSCSFELGNDDLCFNLQLYRCKFLLSISHFIQLHKF          | 41    |
| 8        | CGCGGGCG                                           | 8     |
| 9        | DDKCGCAVPCPGGTGCRYGDLVALGILATVKPTEQFKCASSARSGGGDHT | 50    |
| 10       | LKSLQETQKIK                                        | 11    |
| 11       | RESQPTGRENRA                                       | 13    |
| 12       | PAKEQF                                             | 6     |
| 13       | MSTLVGVVFL                                         | 11    |
| 14       | KMYPDLPEKNTT                                       | 12    |
| 15       | RWRAAD                                             | 6     |
| 16       | PSKGHA                                             | 6     |
| 17       | APEKKA                                             | 6     |
| 18       | QLNLARLP                                           | 8     |
| 19       | STTTTAPAATT                                        | 11    |
| 20       | LEFYNYKF                                           | 8     |
