# Supplementary material for: Genome-Wide Identification and Analysis of the Metallothionein Genes in Oryza Genus
Source: MDPI journal article supplement (doi:10.3390/ijms22179651), 2021-09-06
Supplement: s1 [file s1]

**Supplementary Table S4.** Analysis of orthologous groups genes in six *Oryza* Genus

| <b>Name</b> | <b>Os</b> | <b>Or</b> | <b>On</b> | <b>Oi</b> | <b>Og</b> | <b>Ob</b> | <b>Total</b> |
|-------------|-----------|-----------|-----------|-----------|-----------|-----------|--------------|
| Orthogroup0 | 1         | 2         | 1         | 3         | 2         | 1         | 10           |
| Orthogroup1 | 1         | 1         | 1         | 1         | 1         | 1         | 6            |
| Orthogroup2 | 1         | 1         | 0         | 2         | 1         | 1         | 6            |
| Orthogroup3 | 1         | 1         | 1         | 1         | 0         | 2         | 6            |
| Orthogroup4 | 1         | 1         | 1         | 1         | 1         | 1         | 6            |
| Orthogroup5 | 1         | 1         | 1         | 2         | 1         | 0         | 6            |
| Orthogroup6 | 2         | 1         | 0         | 1         | 0         | 1         | 5            |
| Orthogroup7 | 0         | 0         | 1         | 0         | 1         | 1         | 3            |
| Orthogroup8 | 0         | 0         | 1         | 0         | 1         | 1         | 3            |
