# Supplementary material for: Genome-Wide Identification and Analysis of the Metallothionein Genes in Oryza Genus
Source: MDPI journal article supplement (doi:10.3390/ijms22179651), 2021-09-06
Supplement: s1 [file s1]

**Supplementary Table S8.** List of oligonucleotide primers used for dual-luciferase assays

| Name      | Forward (+)                                          | Reverse (-)                                             |
|-----------|------------------------------------------------------|---------------------------------------------------------|
| OsMT-1Pro | TCGAATTCCTGCAGCCCGGGGATCCcttttgaacacgacgtttaaccgtcca | GCGGCCGCTCTAGAACTAGTGGATCCatcgatcgaactgcgggcactga       |
| OsMT-2Pro | TCGAATTCCTGCAGCCCGGGGATCCtttgagacgtgtcacaatttcca     | GCGGCCGCTCTAGAACTAGTGGATCCtgacaaggagatgaagggtttgaga     |
| OsMT-3Pro | TCGAATTCCTGCAGCCCGGGGATCCagctagagtccaacacggtcgaaaa   | GCGGCCGCTCTAGAACTAGTGGATCCctgtgcgtgtcacaatggtttcttg     |
| OsMT-4Pro | TCGAATTCCTGCAGCCCGGGGATCCattgcagtgagtaccacccatggt    | GCGGCCGCTCTAGAACTAGTGGATCCgcaatgcatagccttcgggtcctcc     |
| OsMT-5Pro | TCGAATTCCTGCAGCCCGGGGATCCtgttgctatactagtgtgatttggtc  | GCGGCCGCTCTAGAACTAGTGGATCCgatgtagctggttgaaatggccttg     |
| OsMT-6Pro | TCGAATTCCTGCAGCCCGGGGATCCgaagctacggctgttattccatgta   | GCGGCCGCTCTAGAACTAGTGGATCCcttcaggaacttgatgcaatgagag     |
| OsMT-7Pro | TCGAATTCCTGCAGCCCGGGGATCCatgtcaattttgaaacgagcctttgc  | GCGGCCGCTCTAGAACTAGTGGATCCattgctgaaagcataccatgatcctata  |
| OsMT-8Pro | TCGAATTCCTGCAGCCCGGGGATCCgcacacgacctgacttggcatttg    | GCGGCCGCTCTAGAACTAGTGGATCCtccatcttgcttcaatactatgatgctga |
| OsMT-9Pro | TCGAATTCCTGCAGCCCGGGGATCCttccattgcttggtcagatggctg    | GCGGCCGCTCTAGAACTAGTGGATCCcttgatcgtctgggtctcttgtaaact   |
