# Supplementary material for: Genome-Wide Identification and Analysis of the Metallothionein Genes in Oryza Genus
Source: Int J Mol Sci. 2021 Sep 6;22(17):9651. doi: 10.3390/ijms22179651 (PMC8431808; doi:10.3390/ijms22179651)
Supplement: Supplementary file 1 [file ijms-22-09651-s001.zip]

Archive with 9 entries (9 files):
- Supplementary/Supplementary Figures.pdf
- Supplementary/Supplementary Table S1.pdf
- Supplementary/Supplementary Table S2.pdf
- Supplementary/Supplementary Table S3.pdf
- Supplementary/Supplementary Table S4.pdf
- Supplementary/Supplementary Table S5.xlsx
- Supplementary/Supplementary Table S6.pdf
- Supplementary/Supplementary Table S7.pdf
- Supplementary/Supplementary Table S8.pdf
