# Supplementary material for: Genome-Wide Identification and Analysis of the Metallothionein Genes in Oryza Genus
Source: Int J Mol Sci. 2021 Sep 6;22(17):9651. doi: 10.3390/ijms22179651 (PMC8431808; doi:10.3390/ijms22179651)
Supplement: Supplementary file 1 [file ijms-22-09651-s001.zip › Supplementary/Supplementary Table S5.xlsx]

## Sheet: Sheet1
Supplementary Table S5. Cis-acting elements in all OsMT genes of Oryza sativa ssp. japonica
Name	Start	End	Cis-element
OsMT-1	539	579	abscisic acid responsiveness
OsMT-1	998	1038	abscisic acid responsiveness
OsMT-1	1170	1210	abscisic acid responsiveness
OsMT-1	1241	1281	abscisic acid responsiveness
OsMT-1	1418	1458	abscisic acid responsiveness
OsMT-1	1420	1460	abscisic acid responsiveness
OsMT-1	1421	1461	abscisic acid responsiveness
OsMT-1	0	40	light responsive/responsiveness
OsMT-1	380	420	light responsive/responsiveness
OsMT-1	1092	1132	light responsive/responsiveness
OsMT-1	1214	1254	anaerobic induction
OsMT-1	538	578	light responsive/responsiveness
OsMT-1	1420	1460	light responsive/responsiveness
OsMT-1	103	143	light responsive/responsiveness
OsMT-1	894	934	light responsive/responsiveness
OsMT-1	696	736	low-temperature responsiveness
OsMT-1	1470	1510	light response
OsMT-1	649	689	gibberellin-responsiveness
OsMT-1	99	139	light responsive/responsiveness
OsMT-1	0	40	light responsive/responsiveness
OsMT-1	998	1038	light responsive/responsiveness
OsMT-1	1170	1210	light responsive/responsiveness
OsMT-1	1240	1280	light responsive/responsiveness
OsMT-1	1415	1455	light responsive/responsiveness
OsMT-1	1418	1458	light responsive/responsiveness
OsMT-1	1420	1460	light responsive/responsiveness
OsMT-1	982	1022	zein metabolism regulation
OsMT-2	814	854	zein metabolism regulation
OsMT-2	902	942	MeJA-responsiveness
OsMT-2	905	945	MeJA-responsiveness
OsMT-2	0	40	light responsive/responsiveness
OsMT-2	1034	1074	light responsive/responsiveness
OsMT-2	876	916	drought-inducibility
OsMT-2	1183	1223	drought-inducibility
OsMT-2	1119	1159	light responsive/responsiveness
OsMT-2	548	588	light responsive/responsiveness
OsMT-2	693	733	light responsive/responsiveness
OsMT-2	902	942	MeJA-responsiveness
OsMT-2	905	945	MeJA-responsiveness
OsMT-2	1230	1270	light responsive/responsiveness
OsMT-2	1294	1334	light responsive/responsiveness
OsMT-2	0	40	abscisic acid responsiveness
OsMT-2	548	588	abscisic acid responsiveness
OsMT-2	693	733	abscisic acid responsiveness
OsMT-2	1035	1075	abscisic acid responsiveness
OsMT-2	743	783	light responsive/responsiveness
OsMT-3	943	983	light responsive/responsiveness
OsMT-3	1002	1042	light responsive/responsiveness
OsMT-3	1559	1599	light responsive/responsiveness
OsMT-3	805	845	MeJA-responsiveness
OsMT-3	1191	1231	light responsive/responsiveness
OsMT-3	762	802	drought-inducibility
OsMT-3	1062	1102	drought-inducibility
OsMT-3	1481	1521	drought-inducibility
OsMT-3	1550	1590	drought-inducibility
OsMT-3	15	55	meristem expression
OsMT-3	186	226	light response
OsMT-3	224	264	low-temperature responsiveness
OsMT-3	1189	1229	light responsive/responsiveness
OsMT-3	833	873	light responsive/responsiveness
OsMT-3	188	228	light responsive/responsiveness
OsMT-3	86	126	light responsive/responsiveness
OsMT-3	1191	1231	abscisic acid responsiveness
OsMT-3	1192	1232	abscisic acid responsiveness
OsMT-3	550	590	anaerobic induction
OsMT-3	1574	1614	anaerobic induction
OsMT-3	805	845	MeJA-responsiveness
OsMT-4	726	766	light responsive/responsiveness
OsMT-4	1154	1194	abscisic acid responsiveness
OsMT-4	1462	1502	abscisic acid responsiveness
OsMT-4	1464	1504	abscisic acid responsiveness
OsMT-4	210	250	light responsive/responsiveness
OsMT-4	815	855	anaerobic induction
OsMT-4	1049	1089	MeJA-responsiveness
OsMT-4	1198	1238	low-temperature responsiveness
OsMT-4	510	550	light responsive/responsiveness
OsMT-4	1253	1293	light responsive/responsiveness
OsMT-4	1019	1059	drought-inducibility
OsMT-4	969	1009	gibberellin-responsiveness
OsMT-4	713	753	light responsive/responsiveness
OsMT-4	1049	1089	MeJA-responsiveness
OsMT-4	20	60	light responsive/responsiveness
OsMT-4	1153	1193	light responsive/responsiveness
OsMT-4	1464	1504	light responsive/responsiveness
OsMT-5	812	852	MeJA-responsiveness
OsMT-5	1289	1329	MeJA-responsiveness
OsMT-5	1342	1382	MeJA-responsiveness
OsMT-5	1383	1423	MeJA-responsiveness
OsMT-5	1386	1426	MeJA-responsiveness
OsMT-5	316	356	light responsive/responsiveness
OsMT-5	288	328	light responsive/responsiveness
OsMT-5	1274	1314	drought-inducibility
OsMT-5	812	852	MeJA-responsiveness
OsMT-5	1289	1329	MeJA-responsiveness
OsMT-5	1342	1382	MeJA-responsiveness
OsMT-5	1383	1423	MeJA-responsiveness
OsMT-5	1386	1426	MeJA-responsiveness
OsMT-5	626	666	anaerobic induction
OsMT-6	1478	1518	auxin-responsive
OsMT-6	8	48	light responsive/responsiveness
OsMT-6	425	465	meristem expression
OsMT-6	9	49	abscisic acid responsiveness
OsMT-6	243	283	abscisic acid responsiveness
OsMT-6	441	481	abscisic acid responsiveness
OsMT-6	783	823	abscisic acid responsiveness
OsMT-6	1169	1209	abscisic acid responsiveness
OsMT-6	1492	1532	light responsive/responsiveness
OsMT-6	1471	1511	MeJA-responsiveness
OsMT-6	1474	1514	MeJA-responsiveness
OsMT-6	634	674	anaerobic induction
OsMT-6	357	397	light responsive/responsiveness
OsMT-6	9	49	light responsive/responsiveness
OsMT-6	36	76	gibberellin-responsiveness
OsMT-6	484	524	light responsive/responsiveness
OsMT-6	1295	1335	light responsive/responsiveness
OsMT-6	725	765	light responsive/responsiveness
OsMT-6	1029	1069	light responsive/responsiveness
OsMT-6	242	282	light responsive/responsiveness
OsMT-6	440	480	light responsive/responsiveness
OsMT-6	783	823	light responsive/responsiveness
OsMT-6	1389	1429	zein metabolism regulation
OsMT-6	1471	1511	zein metabolism regulation
OsMT-6	1471	1511	MeJA-responsiveness
OsMT-6	1474	1514	MeJA-responsiveness
OsMT-6	700	740	light responsive/responsiveness
OsMT-7	783	823	light responsive/responsiveness
OsMT-7	1338	1378	light responsive/responsiveness
OsMT-7	139	179	anaerobic induction
OsMT-7	906	946	anaerobic induction
OsMT-7	913	953	auxin-responsive
OsMT-7	1165	1205	light responsive/responsiveness
OsMT-7	674	714	gibberellin-responsiveness
OsMT-7	1468	1508	auxin-responsive
OsMT-7	1090	1130	salicylic acid responsiveness
OsMT-7	623	663	light responsive/responsiveness
OsMT-7	579	619	light responsive/responsiveness
OsMT-7	615	655	light responsive/responsiveness
OsMT-7	258	298	low-temperature responsiveness
OsMT-8	665	705	meristem expression
OsMT-8	828	868	anoxic specific inducibility
OsMT-8	857	897	anoxic specific inducibility
OsMT-8	1059	1099	auxin-responsive
OsMT-8	897	937	light responsive/responsiveness
OsMT-8	109	149	light responsive/responsiveness
OsMT-8	1005	1045	light responsive/responsiveness
OsMT-8	558	598	abscisic acid responsiveness
OsMT-8	1579	1619	abscisic acid responsiveness
OsMT-8	557	597	light responsive/responsiveness
OsMT-8	362	402	anaerobic induction
OsMT-8	1157	1197	anaerobic induction
OsMT-8	696	736	MeJA-responsiveness
OsMT-8	861	901	MeJA-responsiveness
OsMT-8	979	1019	MeJA-responsiveness
OsMT-8	1031	1071	MeJA-responsiveness
OsMT-8	1046	1086	MeJA-responsiveness
OsMT-8	696	736	MeJA-responsiveness
OsMT-8	861	901	MeJA-responsiveness
OsMT-8	979	1019	MeJA-responsiveness
OsMT-8	1031	1071	MeJA-responsiveness
OsMT-8	1046	1086	MeJA-responsiveness
OsMT-8	788	828	light responsive/responsiveness
OsMT-8	0	40	light responsive/responsiveness
OsMT-8	1579	1619	light responsive/responsiveness
OsMT-8	1354	1394	light responsive/responsiveness
OsMT-9	125	165	low-temperature responsiveness
OsMT-9	64	104	light responsive/responsiveness
OsMT-9	143	183	light responsive/responsiveness
OsMT-9	340	380	anaerobic induction
OsMT-9	658	698	anaerobic induction
OsMT-9	1197	1237	anaerobic induction
OsMT-9	1334	1374	MeJA-responsiveness
OsMT-9	1387	1427	MeJA-responsiveness
OsMT-9	1450	1490	MeJA-responsiveness
OsMT-9	1453	1493	MeJA-responsiveness
OsMT-9	355	395	abscisic acid responsiveness
OsMT-9	511	551	abscisic acid responsiveness
OsMT-9	514	554	abscisic acid responsiveness
OsMT-9	515	555	abscisic acid responsiveness
OsMT-9	1163	1203	abscisic acid responsiveness
OsMT-9	1165	1205	abscisic acid responsiveness
OsMT-9	355	395	light responsive/responsiveness
OsMT-9	514	554	light responsive/responsiveness
OsMT-9	1165	1205	light responsive/responsiveness
OsMT-9	998	1038	light responsive/responsiveness
OsMT-9	1119	1159	light responsive/responsiveness
OsMT-9	1334	1374	MeJA-responsiveness
OsMT-9	1387	1427	MeJA-responsiveness
OsMT-9	1450	1490	MeJA-responsiveness
OsMT-9	1453	1493	MeJA-responsiveness
OsMT-9	558	598	zein metabolism regulation
OsMT-9	1611	1651	zein metabolism regulation
OsMT-9	756	796	gibberellin-responsiveness
OsMT-9	801	841	light responsive/responsiveness
OsMT-9	1290	1330	light responsive/responsiveness
OsMT-9	370	410	drought-inducibility
